# Supplementary material for: A ferrocene-linked metal-covalent organic polymer as a peroxidase-enzyme mimic for dual channel detection of hydrogen peroxide
Source: Royal Society of Chemistry journal article supplement (doi:10.1039/d0an01837f), 2020-10-20
Supplement: d0an01837f1.pdf [file d0an01837f1.pdf]

## **Supporting information**

### **Ferrocene-Linked Covalent Organic Polymer as Peroxidase -Enzyme**

#### **Mimics for Dualchannel Detection of Hydrogen Peroxide**

Qiong Hu,<sup>a</sup> Yishan Fang,<sup>b</sup> Xiongtao Yu,<sup>a</sup> Jianzhi Huang,<sup>a</sup> and Lishi Wang\*<sup>a</sup>

<sup>a</sup> Key Laboratory of Functional Molecular Engineering of Guangdong Province, School of Chemistry and Chemical Engineering, South China University of Technology, Guangzhou 510641, China. E-mail: wanglsh@scut.edu.cn

<sup>b</sup> State Key Laboratory of Biobased Material and Green Papermaking, School of Food Science and Engineering, Qilu University of Technology, Shandong Academy of Sciences, Jinan, 250353, China.

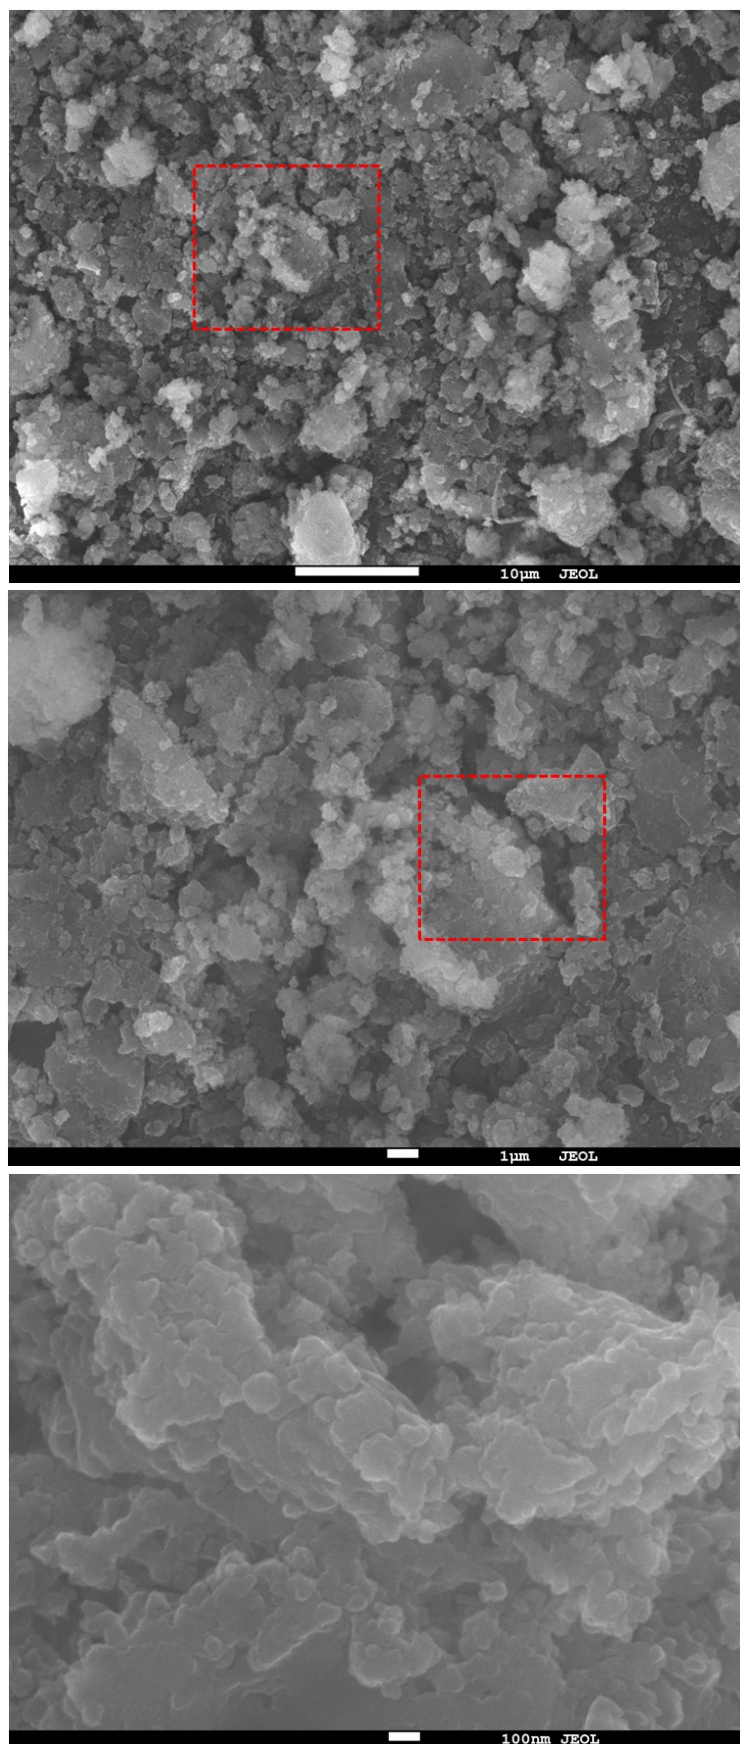

**Fig.S1** SEM of MCOP-NFC

**Table S1** List of limit of detection (LOD) values of various peroxidase mimicking materials for the detection of H<sub>2</sub>O<sub>2</sub>.

| Materials                                | Detection Method              |                              | Reference        |
|------------------------------------------|-------------------------------|------------------------------|------------------|
|                                          | Electrochemical<br>1 channel  | Colorimetric<br>channel      |                  |
| Au@PtNP/GO                               | 1.62 $\mu$ M                  |                              | [1]              |
| CuCo <sub>2</sub> O <sub>4</sub>         | 3.0 $\mu$ M                   | --                           | [2]              |
| 2D Cu-TCPP/MWCNT                         | 0.70 $\mu$ M                  | --                           | [3]              |
| In-aip                                   | 0.87 $\mu$ M                  | --                           | [4]              |
| NiCo LDH                                 | 0.48 $\mu$ M                  | --                           | [5]              |
| Fe <sub>3</sub> O <sub>4</sub> MNPs      | --                            | 3.0 $\mu$ M                  | [6]              |
| CuFKZP <sub>2</sub> W <sub>18</sub> /PPy | --                            | 0.07 $\mu$ M                 | [7]              |
| Ni <sub>4</sub> SiW <sub>12</sub> NPs    | --                            | 2.07 $\mu$ M                 | [8]              |
| RuO <sub>2</sub> NPs                     | 0.18 $\mu$ M                  | 1.8 $\mu$ M                  | [9]              |
| <b>COP-NFC</b>                           | <b>0.08 <math>\mu</math>M</b> | <b>2.1 <math>\mu</math>M</b> | <b>This work</b> |

## References

- [1] E. Ko, V.-K. Tran, S.E. Son, W. Hur, H. Choi, G.H. Seong, Characterization of Au@PtNP/GO nanozyme and its application to electrochemical microfluidic devices for quantification of hydrogen peroxide, *Sensors and Actuators B: Chemical* 294 (2019) 166-176.
- [2] T.W. Di Cheng, Guangxue Zhang, Huimin Wu, He Mei A novel nonenzymatic electrochemical sensor based on double-shelled CuCo<sub>2</sub>O<sub>4</sub> hollow microspheres for glucose and H<sub>2</sub>O<sub>2</sub>, *Journal of Alloys and Compounds* 819 (2020) 153014.
- [3] S.H. Caoyu Wang, Lingzi Luo, Ying Zhou, Xingchang Lu, Geng Zhang, Huan Ye, Jiangjiang Gu, Feifei Cao, Ultrathin two-dimension metal-organic framework nanosheets/multi-walled carbon nanotube composite films for the electrochemical detection of H<sub>2</sub>O<sub>2</sub>, *Journal of Electroanalytical Chemistry* 835 (2019) 178–185.
- [4] Q.L. Di Ning, Qian Wang, Xiao-Meng Du, Wen-Juan Ruan, Yue Li, Luminescent MOF nanosheets for enzyme assisted detection of H<sub>2</sub>O<sub>2</sub> and glucose and activity assay of glucose oxidase, *Sensors & Actuators: B. Chemical* 282 (2019) 443–448.
- [5] H.X. Yue Sun, Xi Zhao, Zengyu Hui, Chenyang Yu, Lumin Wang, Jialu Xue, Yue Zhao, Ruicong Zhou, Henghan Dai, Chunyang Miao, Qiang Chen, Jinyuan Zhou, Gengzhi Sun and Wei Huang, Identifying the active site of ultrathin NiCo LDH as an efficient peroxidase mimic with superior substrate affinity for sensitive detection of hydrogen peroxide, *J. Mater. Chem. B* 7(40) (2019) 6232-6237.
- [6] H. Wei, E. Wang, Fe<sub>3</sub>O<sub>4</sub> Magnetic Nanoparticles as Peroxidase Mimetics and Their Applications in H<sub>2</sub>O<sub>2</sub> and Glucose Detection, *Analytical chemistry* 80(6) (2008) 2250-2254.
- [7] J.-Q. Sha, Q. Li, M. Xu, X. Li, S. Li, L. Hou, Y.-H. Chen, Polypyrrole Coating Eightfold Helical Wells-Dawson POMs based Cu-FKZ Framework for Boosting Colorimetric Sensing, *Analyst* (2020).
- [8] Z. Tong, M. Xu, Q. Li, C. Liu, Y. Wang, J. Sha, Polyelectrolyte-functionalized reduced graphene oxide wrapped helical POMOF nanocomposites for bioenzyme-free colorimetric biosensing, *Talanta* 220 (2020) 121373.
- [9] S.-B. He, P. Balasubramanian, Z.-W. Chen, Q. Zhang, Q.-Q. Zhuang, H.-P. Peng, H.-H. Deng, X.-H. Xia, W. Chen, Protein-Supported RuO<sub>2</sub> Nanoparticles with Improved Catalytic Activity, In Vitro Salt Resistance, and Biocompatibility: Colorimetric and Electrochemical Biosensing of Cellular H<sub>2</sub>O<sub>2</sub>, *ACS Applied Materials & Interfaces* 12(13) (2020) 14876-14883.
